# Supplementary material
Source: Royal Society of Chemistry journal article supplement (doi:10.1039/d6py00204h)
Supplement: d6py00204h1.pdf [file d6py00204h1.pdf]

## Supporting Information

### Programmable Topological Regulation of Hierarchically Organized Crosslinked Epoxy Thermosets for Improved Dielectric and Thermal Properties

Yiliang Gao<sup>1,2</sup>, Lijia Liu<sup>1,2\*</sup>, Wenchao Jiang<sup>2</sup>, Longkai Jiao<sup>2</sup>, Yawen Liu<sup>1,2</sup>, Chao Wang<sup>1,2</sup>, Chunhong  
Zhang<sup>1,2\*</sup>, Yudan Wang<sup>1\*</sup>

<sup>1</sup>Key Laboratory of Superlight Materials & Surface Technology, Ministry of Education, Institute of Advanced  
Marine Materials, College of Materials Science and Chemical Engineering, Harbin Engineering University, Harbin  
150001, China;

<sup>2</sup>Yantai Research Institute of Harbin Engineering University, Yantai 264006, China;

Corresponding author: liulijia@hrbeu.edu.cn (Liu L.J.); zhangchunhong97@163.com (Zhang C.H.);

dqlj2000@163.com (Wang Y.D.)

Corresponding author: [liulijia@hrbeu.edu.cn](mailto:liulijia@hrbeu.edu.cn)

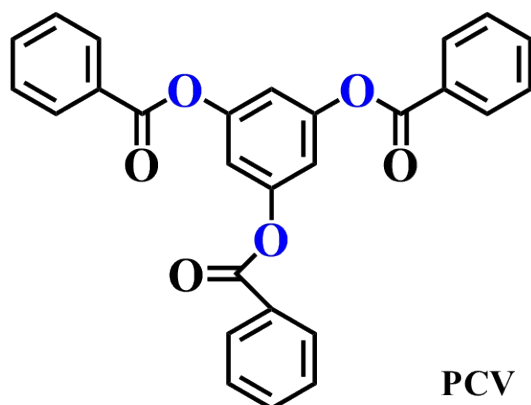

**Fig.S1** Schematic diagram of the PCV structure of the comparison sample

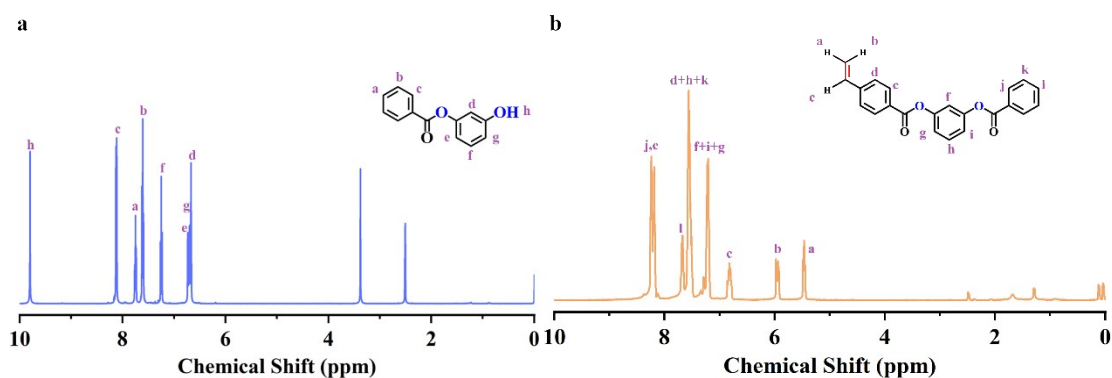

**Fig. S2** <sup>1</sup>H NMR spectra of (a) RC and (b) REA

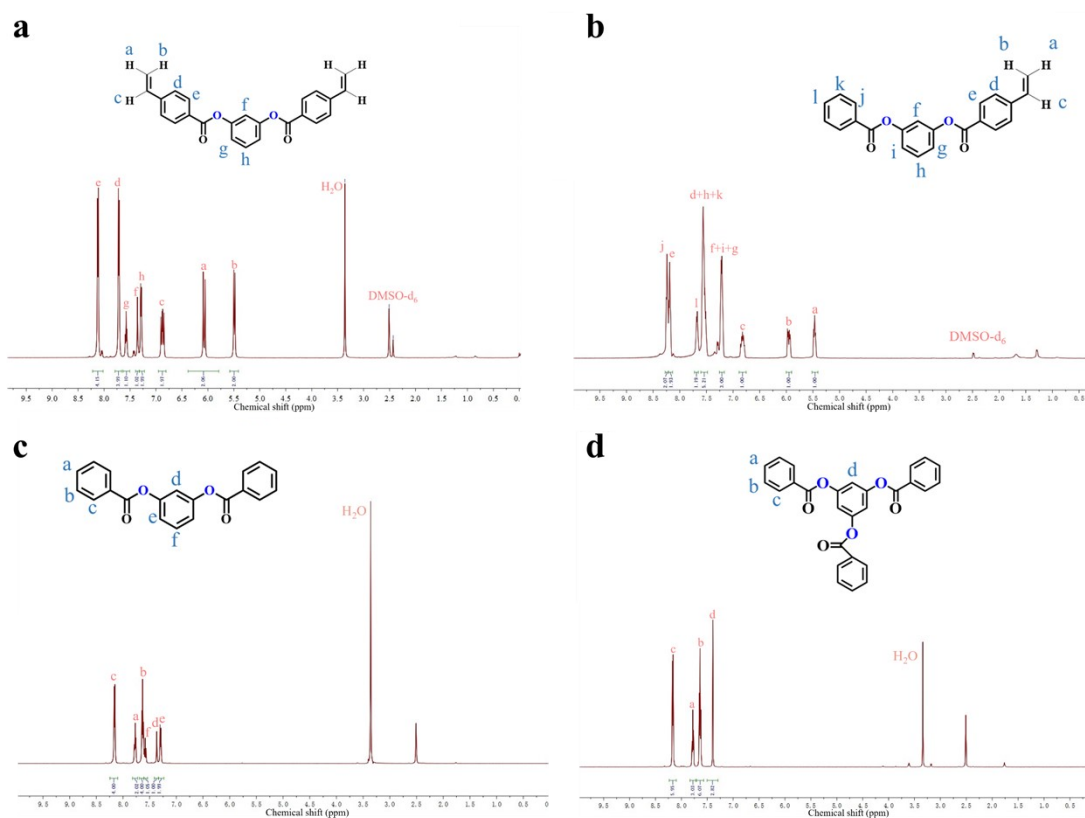

**Fig.S3**  $^1\text{H}$  NMR spectra of the synthesized active esters: (a) REV, (b) REA, (c) BCV, and (d) PCV

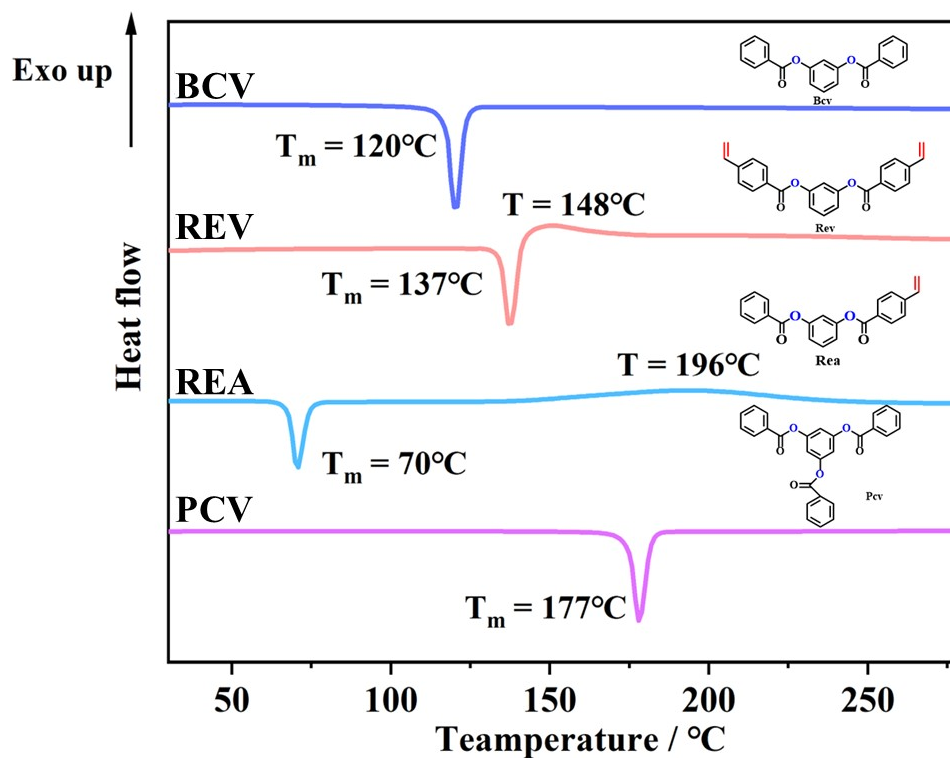

**Fig.S4** The melting characteristics of four compounds

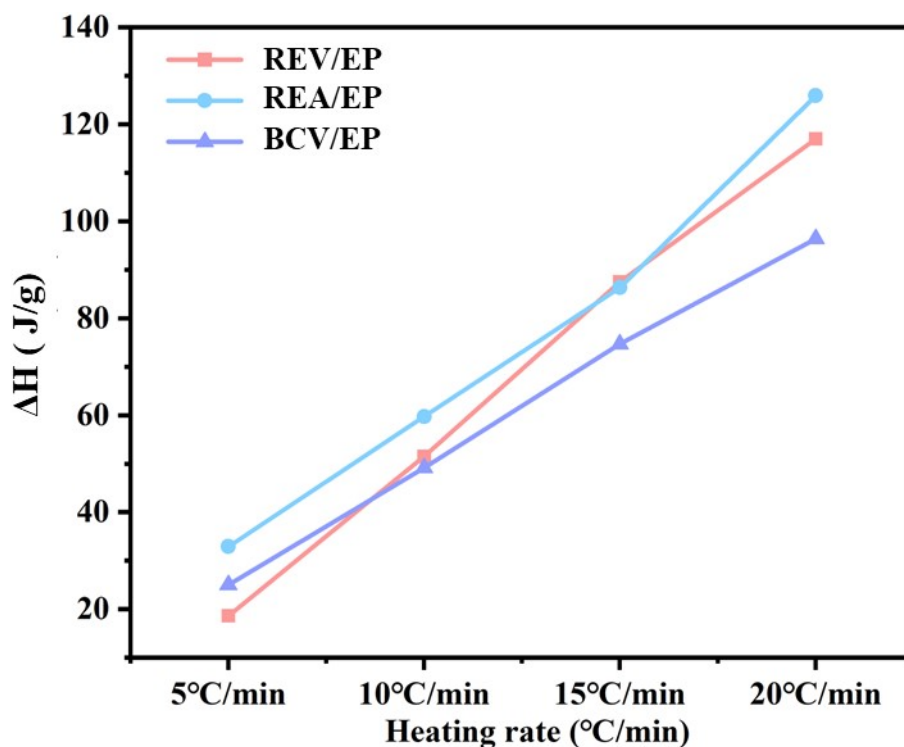

**Fig.S5** The Enthalpy change of REV/EP, REA/EP and BCV/EP at different heating rates

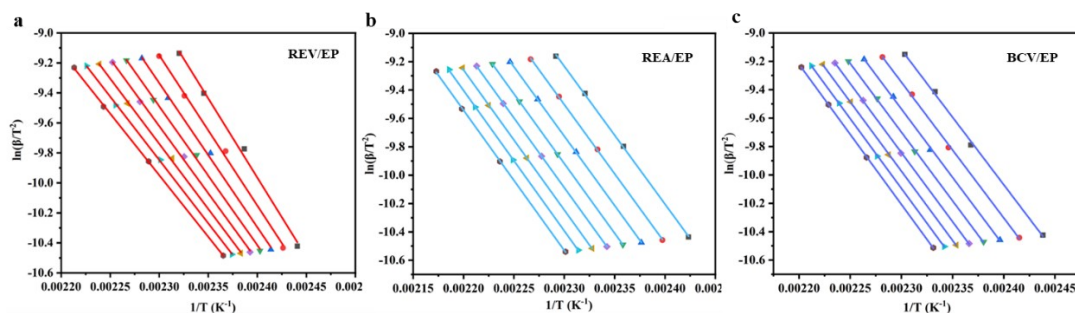

**Fig.S6** The variation process of  $\ln(\beta/T^2)$  and  $1/T(K^{-1})$  under different conversion rates

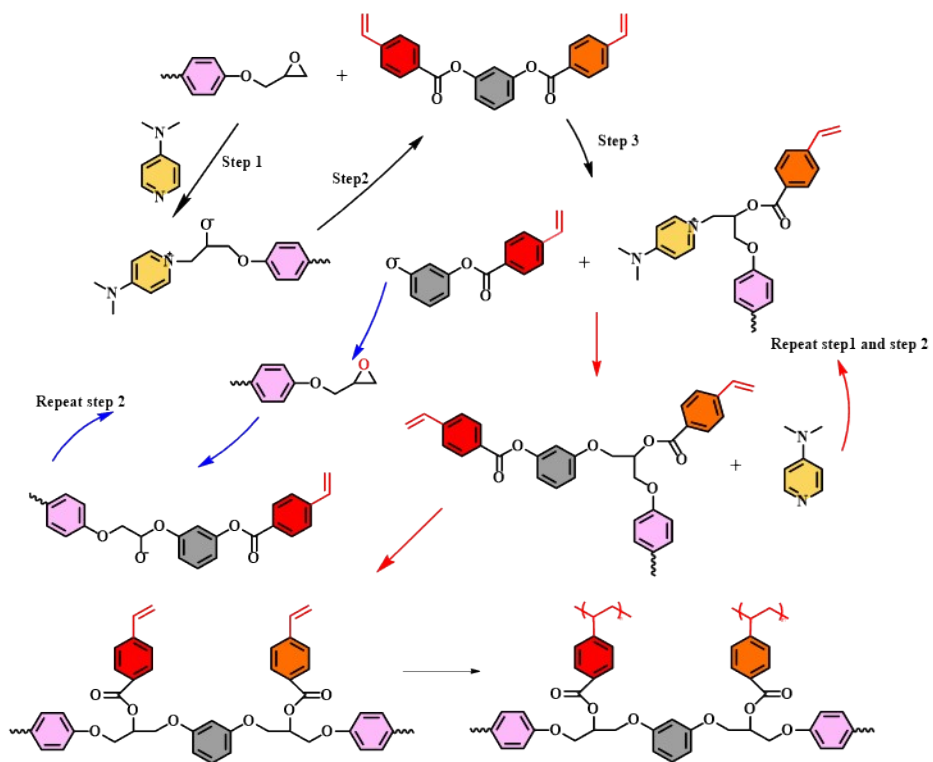

**Fig. S7** Schematic diagram of REV/EP curing mechanism
